# Supplementary material for: Butylene Glycol Used as a Sustainable Solvent for Extracting Bioactive Compounds from Camellia sinensis Flowers with Ultrasound-Assisted Extraction
Source: PubMed Central journal article supplement (PMC9909804; doi:10.1021/acsomega.2c07481), 2023-01-25
Supplement: ao2c07481_si_001.pdf [file ao2c07481_si_001.pdf]

## Supporting Information

Butylene glycol used as a sustainable solvent for  
extracting bioactive compounds from *Camillia*  
*sinensis* flowers with ultrasound-assisted extraction

*Hla Myo*<sup>a</sup>, *Nara Yaowiwat*<sup>a</sup>, *Pawin Pongkorpsakol*<sup>b</sup>, *Chanat Aonbangkhen*<sup>c,d</sup>,

and *Nuntawat Khat-udomkiri*<sup>a,\*</sup>

<sup>a</sup> School of Cosmetic Science, Mae Fah Laung University, Thailand. Emails:

[6351701003@lamduan.mfu.ac.th](mailto:6351701003@lamduan.mfu.ac.th) (HM); [nara.nan@mfu.ac.th](mailto:nara.nan@mfu.ac.th) (NY); [nuntawat.kha@mfu.ac.th](mailto:nuntawat.kha@mfu.ac.th)

(NK)

<sup>b</sup> Princess Srisavangavadhana College of Medicine, Chulabhorn Royal Academy, Bangkok,

Thailand. Emails: [pawin.pon@cra.ac.th](mailto:pawin.pon@cra.ac.th) (PP)

<sup>c</sup> Department of Chemistry, Faculty of Science, Chulalongkorn University, Bangkok, Thailand.

Emails: [Chanat.A@chula.ac.th](mailto:Chanat.A@chula.ac.th) (CA)

<sup>d</sup> Center of Excellence in Natural Products Chemistry (CENP), Department of Chemistry,

Faculty of Science, Chulalongkorn University, Bangkok, Thailand. Emails:

[Chanat.A@chula.ac.th](mailto:Chanat.A@chula.ac.th) (CA)

## ASSOCIATED CONTENT

## Supporting Information

a

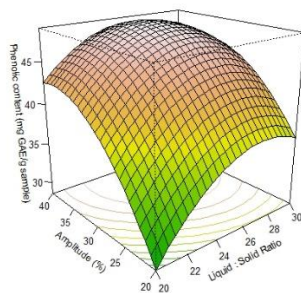

Slice at SolventConc = 80

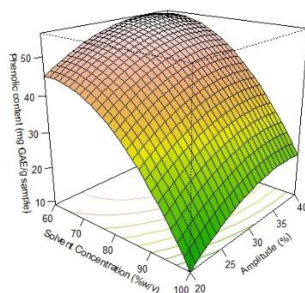

Slice at SolidLiquidRatio = 25

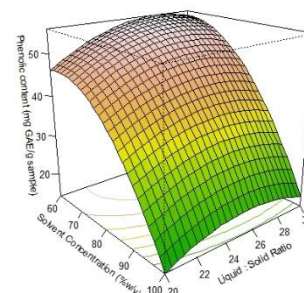

Slice at Amplitude = 30

b

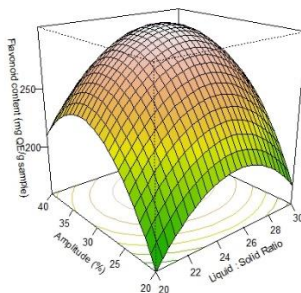

Slice at SolventConc = 80

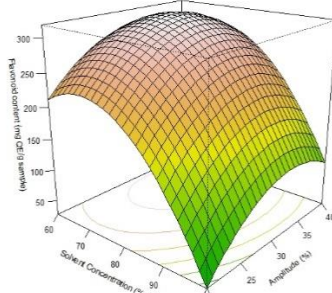

Slice at SolidLiquidRatio = 25

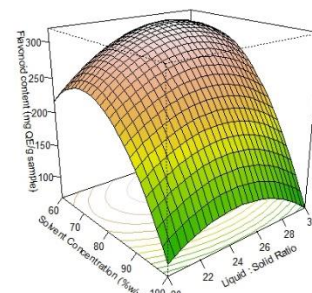

Slice at Amplitude = 30

c

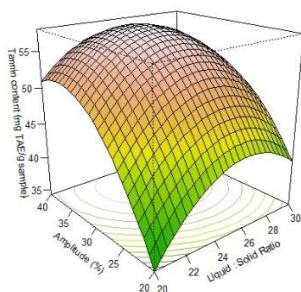

Slice at SolventConc = 80

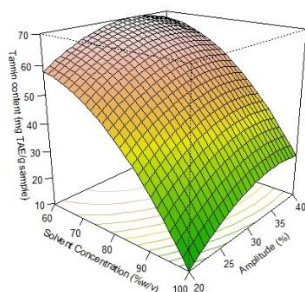

Slice at SolidLiquidRatio = 25

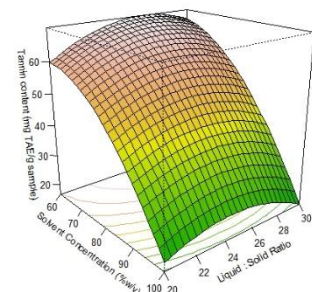

Slice at Amplitude = 30

d

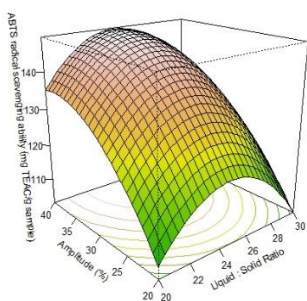

Slice at SolventConc = 80

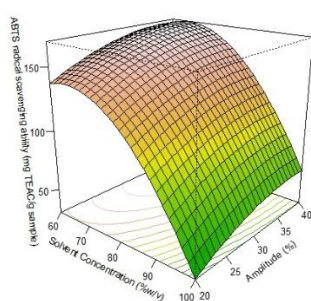

Slice at SolidLiquidRatio = 25

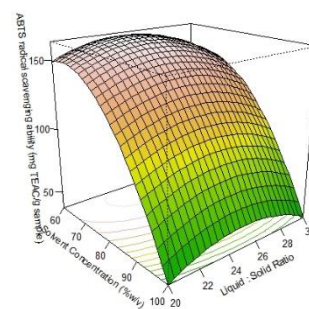

Slice at Amplitude = 30

e

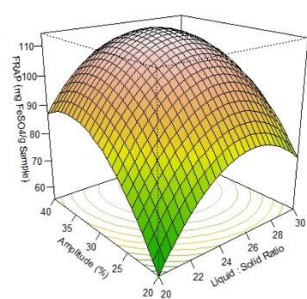

Slice at SolventConc = 80

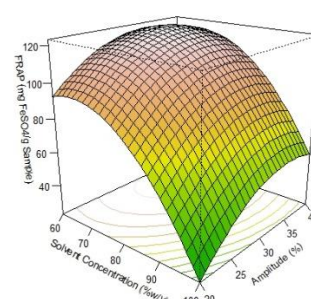

Slice at SolidLiquidRatio = 25

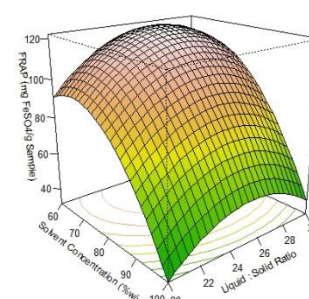

Slice at Amplitude = 30

**Figure S1** The three-dimensional response surface configurations for the impacts of amplitude, liquid-solid ratio, and solvent concentration on TPC (a), TFC (b), TTC (c), ABTS (d), and FRAP (e).

**Table S1.** Analysis of variance of all responses in BBD

| Response | Source       | Sum Sq  | Df | Mean Sq | F value | Pr (>F)  |
|----------|--------------|---------|----|---------|---------|----------|
| TPC      | Model        | 3462.45 | 9  | 384.72  | 60.74   | 2.09E-06 |
|          | Linear       | 2754.32 | 3  | 918.11  | 144.96  | 2.60E-07 |
|          | Interaction  | 18.88   | 3  | 6.29    | 0.99    | 0.444    |
|          | Quadratic    | 689.25  | 3  | 229.75  | 36.28   | 5.26E-05 |
|          | Residuals    | 50.67   | 8  | 6.33    |         |          |
|          | Lack of fit  | 28.31   | 3  | 9.44    | 2.11    | 0.218    |
|          | Pure error   | 22.36   | 5  | 4.47    |         |          |
|          | Total        | 3513.12 | 17 |         |         |          |
|          | R square     | 0.9856  |    |         |         |          |
|          | Adj R square | 0.9694  |    |         |         |          |
| TFC      | Model        | 138546  | 9  | 15394.0 | 28.28   | 3.98E-05 |
|          | Linear       | 70288   | 3  | 23429.2 | 43.05   | 2.78E-05 |
|          | Interaction  | 1855    | 3  | 618.4   | 1.14    | 0.391    |
|          | Quadratic    | 66403   | 3  | 22134.3 | 40.67   | 3.44E-05 |
|          | Residuals    | 4354    | 8  | 544.3   |         |          |
|          | Lack of fit  | 2679    | 3  | 893.0   | 2.67    | 0.159    |
|          | Pure error   | 1675    | 5  | 335.0   |         |          |
|          | Total        | 142900  | 17 |         |         |          |
|          | R square     | 0.9695  |    |         |         |          |
|          | Adj R square | 0.9352  |    |         |         |          |
|          | Model        | 5409.5  | 9  | 601.06  | 33.37   | 2.12E-05 |
|          | Linear       | 4457.7  | 3  | 1485.9  | 82.51   | 2.34E-06 |
|          | Interaction  | 47.4    | 3  | 15.79   | 0.88    | 0.492    |
|          | Quadratic    | 904.4   | 3  | 301.48  | 16.74   | 8.30E-04 |

|      |              |         |    |         |        |          |
|------|--------------|---------|----|---------|--------|----------|
| TTC  | Residuals    | 144.1   | 8  | 18.01   |        |          |
|      | Lack of fit  | 79.7    | 3  | 26.57   | 2.06   | 0.223    |
|      | Pure error   | 64.4    | 5  | 12.87   |        |          |
|      | Total        | 5553.6  | 17 |         |        |          |
|      | R square     | 0.9741  |    |         |        |          |
|      | Adj R square | 0.9449  |    |         |        |          |
|      | <hr/>        |         |    |         |        |          |
|      | Model        | 15436.3 | 9  | 1715.14 | 122.4  | 1.33E-07 |
|      | Linear       | 7591.6  | 3  | 2530.53 | 180.55 | 1.10E-07 |
|      | Interaction  | 199.2   | 3  | 66.41   | 4.73   | 0.035    |
|      | Quadratic    | 7645.5  | 3  | 2548.49 | 181.84 | 1.07E-07 |
| DPPH | Residuals    | 112.1   | 8  | 14.02   |        |          |
|      | Lack of fit  | 46.9    | 3  | 15.65   | 1.2    | 0.39932  |
|      | Pure error   | 65.2    | 5  | 13.04   |        |          |
|      | Total        | 15548.4 | 17 |         |        |          |
|      | R square     | 0.9928  |    |         |        |          |
|      | Adj R square | 0.9847  |    |         |        |          |
|      | <hr/>        |         |    |         |        |          |
|      | Model        | 32694.7 | 9  | 3632.74 | 73.56  | 9.88E-07 |
|      | Linear       | 24616.5 | 3  | 8205.5  | 166.16 | 1.52E-07 |
|      | Interaction  | 23.7    | 3  | 7.9     | 0.16   | 0.920    |
|      | Quadratic    | 8054.5  | 3  | 2684.8  | 54.37  | 1.15E-05 |
| ABTS | Residuals    | 395.1   | 8  | 49.4    |        |          |
|      | Lack of fit  | 279.3   | 3  | 93.1    | 4.02   | 0.084    |
|      | Pure error   | 115.8   | 5  | 23.2    |        |          |
|      | Total        | 33089.8 | 17 |         |        |          |
|      | R square     | 0.9881  |    |         |        |          |
|      | Adj R square | 0.9746  |    |         |        |          |
|      | <hr/>        |         |    |         |        |          |
|      | Model        | 16586.6 | 9  | 1842.96 | 43.31  | 7.77E-06 |

|      |              |         |    |        |       |          |
|------|--------------|---------|----|--------|-------|----------|
|      | Linear       | 10297.8 | 3  | 3432.6 | 80.67 | 2.55E-06 |
|      | Interaction  | 95.8    | 3  | 31.9   | 0.75  | 0.552    |
|      | Quadratic    | 6193.0  | 3  | 2064.3 | 48.52 | 1.78E-05 |
| FRAP | Residuals    | 340.4   | 8  | 42.6   |       |          |
|      | Lack of fit  | 244.0   | 3  | 81.3   | 4.22  | 0.078    |
|      | Pure error   | 96.4    | 5  | 19.3   |       |          |
|      | Total        | 16927   | 17 |        |       |          |
|      | R square     | 0.9799  |    |        |       |          |
|      | Adj R square | 0.9573  |    |        |       |          |

---

**Table S2.** LC-QQQ parameters of bioactive compounds for analysis of *Camillia sinensis* flower extract

| Bioactive Components            | Retention Time (RT, min) | Ionization Mode of the Analytes | Precursor Ion (m/z, [M – H] <sup>-</sup> ) | Product Ion (m/z)      |
|---------------------------------|--------------------------|---------------------------------|--------------------------------------------|------------------------|
| Gallic acid                     | 1.639                    | Negative                        | 169.10                                     | 125.20                 |
| Caffeine                        | 3.589                    | Positive                        | 195.00                                     | 138.15, 110.10         |
| Catechin                        | 3.955                    | Negative                        | 289.25                                     | 205.20, 245.20         |
| Catechin Gallate (CG)           | 5.630                    | Negative                        | 441.20                                     | 169.20                 |
| Epicatechin (EC)                | 4.766                    | Negative                        | 289.00                                     | 245.30, 203.10, 109.20 |
| Epigallocatechin Gallate (EGCG) | 5.059                    | Negative                        | 457.00                                     | 169.20, 305.20         |
| Epigallocatechin (EGC)          | 3.508                    | Negative                        | 304.80                                     | 125.10, 219.10         |
| Gallocatechin Gallate (GCG)     | 5.312                    | Negative                        | 456.85                                     | 169.20, 305.20         |
| Gallocatechin (GC)              | 2.349                    | Negative                        | 304.95                                     | 125.20, 219.20         |
| <i>p</i> -coumaric acid         | 5.495                    | Negative                        | 162.85                                     | 119.00                 |
| Protocatechuic acid             | 2.627                    | Negative                        | 153.25                                     | 109.05                 |
| Ferulic acid                    | 5.827                    | Negative                        | 193.00                                     | 134.10                 |
| 4-hydroxybenzoic acid           | 6.008                    | Negative                        | 137.05                                     | 92.95                  |
| Kaempferol                      | 5.780                    | Negative                        | 285.00                                     | 143.05, 159.10, 187.20 |
| Naringenin                      | 6.232                    | Negative                        | 271.05                                     | 106.95, 119.05         |
| Theobromine                     | 1.763                    | Positive                        | 181.10                                     | 163.10, 138.10, 110.05 |

**Table S3.** Factors and their levels for Box–Behnken design.

| Factors                   | Label          | Levels |    |     |
|---------------------------|----------------|--------|----|-----|
|                           |                | -1     | 0  | 1   |
| Amplitude (%)             | X <sub>1</sub> | 20     | 30 | 40  |
| Liquid-solid ratio (mL/g) | X <sub>2</sub> | 20     | 25 | 30  |
| Solvent concentration (%) | X <sub>3</sub> | 60     | 80 | 100 |
